# Supplementary material
Source: PubMed Central journal article supplement (PMC5730473)
Supplement: NIHMS925001-supplement-SI.pdf [file NIHMS925001-supplement-SI.pdf]

## *Supporting Information*

### **Ionic Solution: What Goes Right and Wrong with Continuum Solvation Modeling**

Changhao Wang,<sup>1,2,3</sup> Pengyu Ren,<sup>4</sup> and Ray Luo<sup>1,2,5,6,\*</sup>

1. Chemical and Materials Physics Graduate Program, 2. Department of Molecular Biology and Biochemistry, 3. Department of Physics and Astronomy, University of California, Irvine, CA 92697

4. Department of Biomedical Engineering, University of Texas, Austin, TX 78712

5. Department of Chemical Engineering and Materials Science, 6. Department of Biomedical Engineering, University of California, Irvine, CA 92697

\* Please send correspondence to:  
Ray Luo: ray.luo@uci.edu

Table S-1. Simulated volumes and corresponding molalities after 100ns NPT molecular dynamic simulation for all 10 molalities.

| Molality (mol/kg) | Volume ( $\text{\AA}^3$ ) |
|-------------------|---------------------------|
| 0.10              | 16.10                     |
| 0.21              | 16.22                     |
| 0.31              | 16.24                     |
| 0.62              | 16.33                     |
| 1.03              | 16.41                     |
| 2.06              | 16.73                     |
| 3.08              | 17.04                     |
| 4.11              | 17.40                     |
| 5.14              | 17.81                     |
| 6.17              | 18.22                     |

Table S-2. Excess chemical potential  $\mu^{\text{ex}}$ , volume correction term (Vol term), computed chemical potential  $\mu_{\text{NaCl}}$  (This work), simulation result from Mester and Panagiotopoulos (Mester), and experimental results (Experiment) versus molality. All free energies reported are in the unit of kJ/mol. The chemical potential  $\mu_{\text{NaCl}}$  was computed as the sum of  $\mu^{\text{ex}}$ ,  $\mu^0$ , and volume correction term (eqn (5)).

| Molality | $\mu^{\text{ex}}$ | Vol term | This work | Mester | Experiment |
|----------|-------------------|----------|-----------|--------|------------|
| 0.05     | NA                | NA       | NA        | NA     | -409.11    |
| 0.06     | NA                | NA       | NA        | -407.3 | NA         |
| 0.10     | -743.80           | 4.58     | -405.07   | NA     | -405.92    |
| 0.20     | NA                | NA       | NA        | NA     | -402.77    |
| 0.21     | -743.46           | 7.98     | -401.33   | NA     | NA         |
| 0.30     | NA                | NA       | NA        | NA     | -400.92    |
| 0.31     | -743.46           | 9.99     | -399.32   | NA     | NA         |
| 0.40     | NA                | NA       | NA        | NA     | -399.60    |
| 0.50     | NA                | NA       | NA        | NA     | -398.57    |
| 0.56     | NA                | NA       | NA        | -396.2 | NA         |
| 0.62     | -743.73           | 13.39    | -396.19   | NA     | NA         |
| 1.00     | NA                | NA       | NA        | -393.1 | -395.29    |
| 1.05     | -742.55           | 15.90    | -392.50   | NA     | NA         |
| 2.00     | NA                | NA       | NA        | -389.3 | -391.75    |
| 2.06     | -741.79           | 19.24    | -388.40   | NA     | NA         |
| 3.00     | NA                | NA       | NA        | -386   | -389.40    |
| 3.08     | -742.03           | 21.16    | -386.72   | NA     | NA         |
| 4.00     | NA                | NA       | NA        | -383.4 | -387.51    |
| 4.18     | -740.63           | 22.48    | -384.00   | NA     | NA         |
| 5.00     | NA                | NA       | NA        | -380.7 | -385.85    |
| 5.14     | -739.11           | 23.47    | -381.49   | NA     | NA         |
| 6.00     | NA                | NA       | N/A       | -378.7 | -384.34    |
| 6.144    | NA                | NA       | N/A       | N/A    | -384.13    |
| 6.17     | -737.83           | 24.26    | -379.42   | N/A    | N/A        |
